# Supplementary material for: A Study of Small-scale Landslides Susceptibility Dynamic Assessment in South Chian: Merging SBAS-InSAR and Machine Learning
Source: Copernicus journal article supplement (doi:10.5194/egusphere-2026-218), 2026-02-23
Supplement: Supplementary file [file egusphere-2026-218-AC1-supplement.pdf]

# A Study of Small-scale Landslides Susceptibility **Hybrid Static-Dynamic** Assessment in **South China**: Merging SBAS-InSAR and Machine Learning

Zhu liang<sup>1,2,3</sup>, Jingxin Hou<sup>1,2,3</sup>, Yang Liu<sup>1,2,3,\*</sup>, Ting Wang<sup>4</sup>, Guochao Liu<sup>1,2,3</sup>, Chunshuai Si<sup>1,2,3</sup> and Jun Wu<sup>1,2,3</sup>

<sup>1</sup>Guangzhou Urban Planning & Design Survey Research Institute Co., Ltd, Guangzhou, 510060, China

<sup>2</sup>Collaborative Innovation Center for Natural Resources Planning and Marine Technology of Guangzhou, Guangzhou, 510060, China

<sup>3</sup>Guangdong Enterprise Key Laboratory for Urban Sensing, Monitoring and Early Warning, Guangzhou, 510060, China

<sup>4</sup>Guangzhou Meteorological Observatory, Guangzhou, 511430

\* Correspondence: liuyang@gzpi.com.cn

**Abstract.** Shallow landslides, triggered by factors such as heavy rainfall and human engineering activities, are characterized by their sudden occurrence, wide distribution, and small scale, which pose significant threats to human life, especially in southern China. Landslide susceptibility assessment (LSA) is crucial for disaster prevention, mitigation, and land-use planning. Traditional assessment methods, such as field surveys and statistical models, predominantly depend on static geological environment factors, which exhibit inherent limitations in capturing spatiotemporal information on dynamic surface deformation. This deficiency directly leads to a lack of timeliness in hazard assessment, which is particularly important for sudden disasters. In this study, small Baseline Subset (SBAS - InSAR) and machine learning were married to explore a hybrid static-dynamic method in LSA, and the Conghua district in Guangzhou was selected as the study area. **First, a dataset was prepared for the study area, which included 368 historical landslide samples, 368 non-landslide samples, 9 static factors, and 2 dynamic factors interpreted by SBAS - InSAR. Then, the preprocessed factors and sample data were employed to establish three machine learning models, namely Random Forest (RF), Light Gradient Boosting Machine (LightGBM), and Extreme Gradient Boosting (XGBoost). Finally, the performance of these three models was validated using 5-fold cross-validation, with the Area Under the Curve (AUC) as the core evaluation index, and their performance was further compared with that of the models built using only the 9 static factors.** The results show that the SAR-XGBoost model exhibits the best performance, with an AUC of 0.944, and the models considered dynamic factors all performed better than that of static factors only. This study demonstrates that merging SBAS-InSAR and machine learning can provide a reliable technical approach for assessment of small-scale LSA, which is of great significance for targeted disaster prevention and mitigation in rural and hilly areas of South China.

**Keywords:** Landslide susceptibility map; Small-scale; SBAS – InSAR; Machine learning; Static-Dynamic evaluation

## 1. Introduction

Small-scale shallow landslides are a common type of geological disaster, usually occurring in the upper soil layer or weathered rock layer (Ado et al.,2022; Castelli et al.,2025; Sun et al.,2025). Under the combined influence of natural

38 factors (e.g., extreme rainfall, geological weathering) and human activities (e.g., rural road construction, farmland  
39 expansion), small-scale landslides have become one of the most frequent geological disasters in southern China  
40 (Zhang et al., 2021; Wang et al., 2021). Unlike large-scale landslides, small-scale landslides have small volumes  
41 (usually 10 - 1000 m<sup>3</sup>) and shallow sliding depths (1 - 3 m), but they are widely distributed, highly sudden, and  
42 difficult to monitor (Cui et al.,2023). In recent years, under the influence of global climate change, extreme rainfall  
43 events have occurred frequently, and the intensity and frequency of shallow landslides have increased significantly.  
44 With the rapid development of urbanization and infrastructure construction, human engineering activities further  
45 increase the risk of shallow landslides (Liu et al.,2026).

46 Traditional LSA methods mainly include field survey methods, remote sensing image interpretation methods,  
47 and statistical model methods. Field survey methods are time-consuming, labor-intensive, and have limited spatial  
48 coverage, making it difficult to carry out large-area assessments (Kovács et al.,2019). Statistical model methods,  
49 such as the Logistic Regression model, clustering analysis, require a large number of historical landslide data and  
50 cannot handle the nonlinear relationship between factors (Huang et al.,2024; Nwazelibe et al.,2024). In recent years,  
51 machine learning methods have been widely used in LSA due to their strong ability to handle nonlinear and high-  
52 dimensional data (Huang et al.,2024; Zhou et al.,2025). However, most of these studies use static influencing factors  
53 (e.g., lithology, slope, aspect) and ignore the dynamic changes in slope stability, such as subtle surface  
54 deformation before landslide initiation. Landslides often occur after a period of accelerated surface deformation  
55 (e.g., deformation rate increases from -5 mm/year to -15 mm/year within 1 - 2 months before sliding), which is a  
56 key precursor of landslide occurrence (Deng, et al.,2024; Wang et al.,2024).

57 Traditional remote sensing methods (e.g., optical remote sensing) can only identify existing landslides but  
58 cannot capture subtle surface deformation. Field monitoring methods (e.g., inclinometers, GNSS) can measure  
59 surface deformation with high accuracy, but they are limited by high cost and low spatial coverage, making it  
60 difficult to apply in large - area small - scale landslide assessment (Ebrahim et al.,2024; Nie et al.,2025; Wang et  
61 al.,2024). Therefore, the lack of dynamic deformation information is the main bottleneck restricting the accuracy  
62 of small-scale landslide susceptibility assessment. SBAS-InSAR exploits distributed scatterers (DS), which  
63 can retain coherence in areas with sparse vegetation or bare soil through the use of small baseline  
64 interferometric pairs. Unlike permanent scatterers (PS) that require stable point-like targets (e.g., buildings,  
65 rock outcrops), DS-based methods utilize the statistical properties of neighboring pixels with similar scattering  
66 characteristics. In our study area, where over 60% of the land is covered by subtropical forests, DS-based  
67 approaches provide complementary coverage to PS-based methods, particularly in non-urban regions. However,  
68 it should be noted that InSAR coherence in vegetated areas is influenced by multiple factors including vegetation  
69 type, density, height, seasonal variation, and SAR wavelength (Hussain et al.,2025; Zhang et al.,2025; Guo et  
70 al.,2024).

71 The study is to explore and compare the performance of merging SBAS-InSAR technology with different  
72 machine learning models (RF, LightGBM, and XGBoost) in the static-dynamic assessment of small-scale  
73 landslide susceptibility. Conghua Dissect, Guangzhou, was selected as the study area.

## 74 2. Study Area and Data Sources

### 75 2.1 Overview of the Study Area

76 The study area is located in the mountainous area of Guangdong Province, China, with a geographical coordinate  
77 range of 109°20' - 110°00'E and 28°10' - 28°50'N, covering an area of approximately 2,500 km<sup>2</sup>(Fig.1). The study  
78 area has a subtropical monsoon climate, with an average annual rainfall of 1,200 - 1,600 mm, and the rainfall is  
79 mainly concentrated in the flood season (May - September), accounting for more than 70% of the annual rainfall.  
80 The terrain in the study area is complex and undulating, with an elevation range of 200 - 1,800 m. The main  
81 landforms are mountains, hills, and valleys. The stratum in the study area is mainly composed of Devonian  
82 sandstone, shale, Carboniferous limestone, and Quaternary loose deposits. The geological structure is relatively  
83 complex, with faults and folds developed. The study area is an area with frequent shallow landslide disasters  
84 (Chen et al., 2025). In recent years, many shallow landslides have occurred, mainly triggered by **short-term heavy**  
85 **rainfall, prolonged drizzle, house and road construction**. The number of landslides recorded in the study area is  
86 368, with the volume ranging from 15 m<sup>3</sup> to 400 m<sup>3</sup> and the area ranging from 4 m<sup>3</sup> to 100 m<sup>3</sup>(Fig.2). These  
87 landslides have caused serious damage to local infrastructure and people's lives and property, so it is urgent to  
88 carry out a shallow landslide susceptibility assessment in this area.

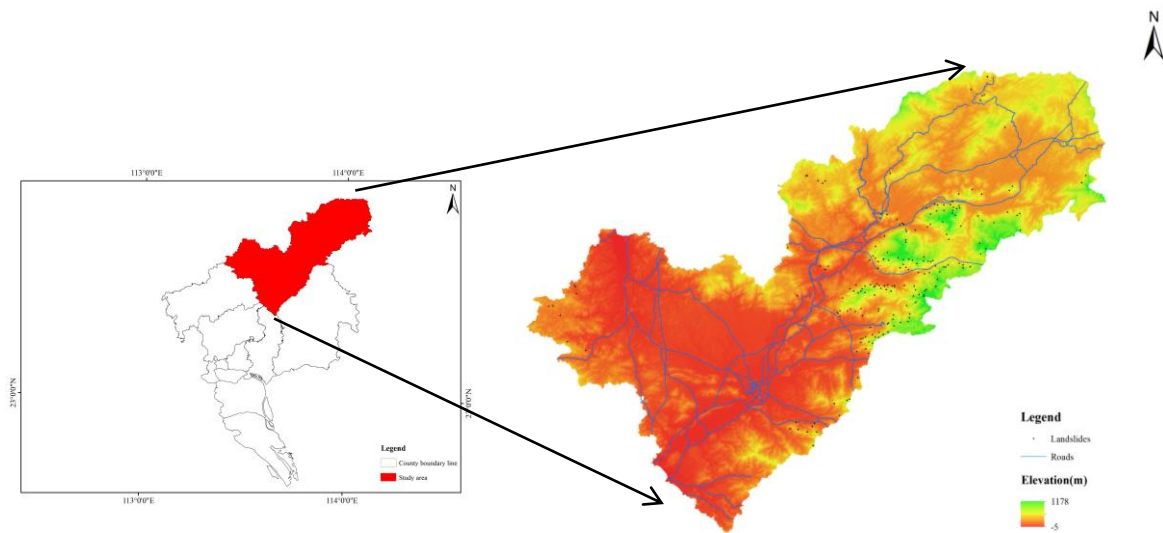

89  
90 **Figure 1: Location of the study area showing elevation and landslide samples.**

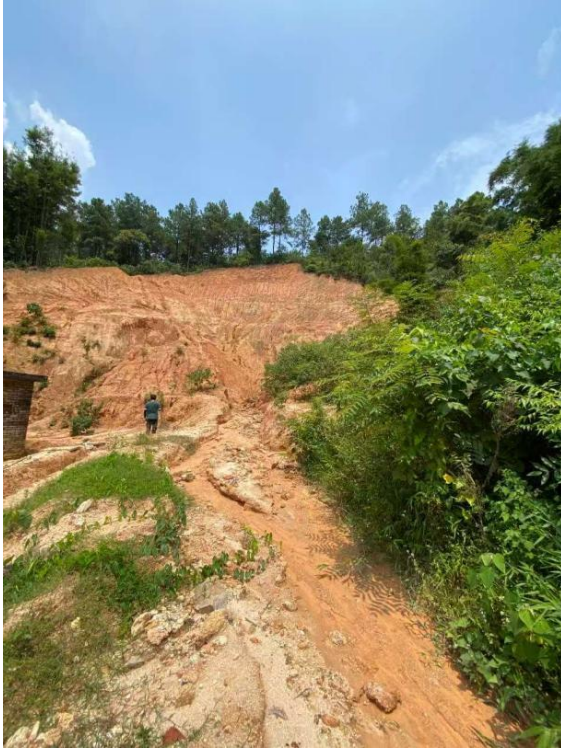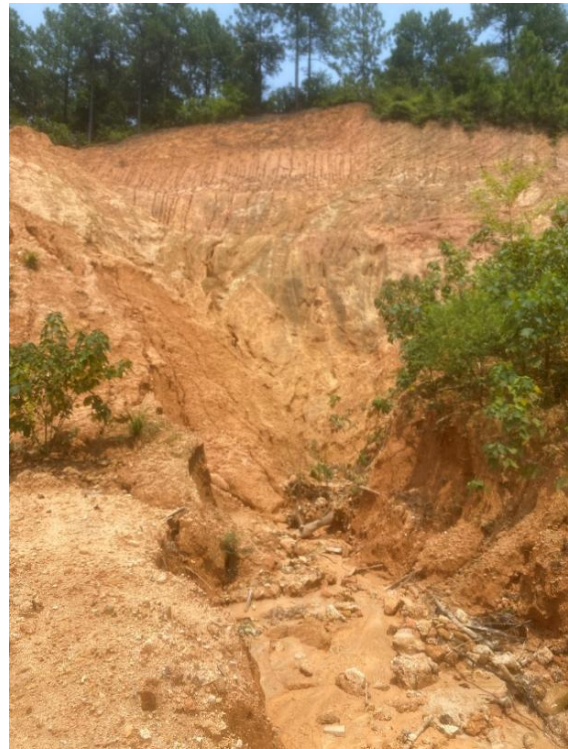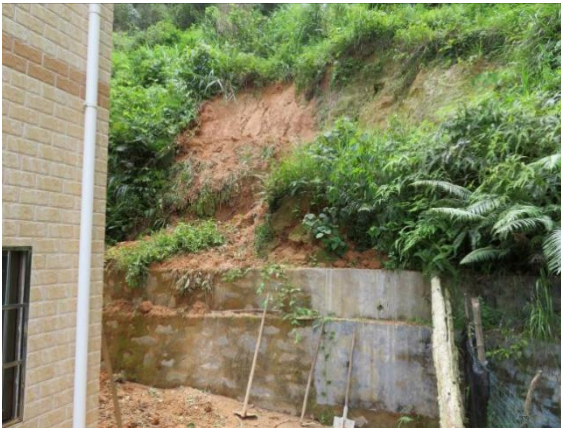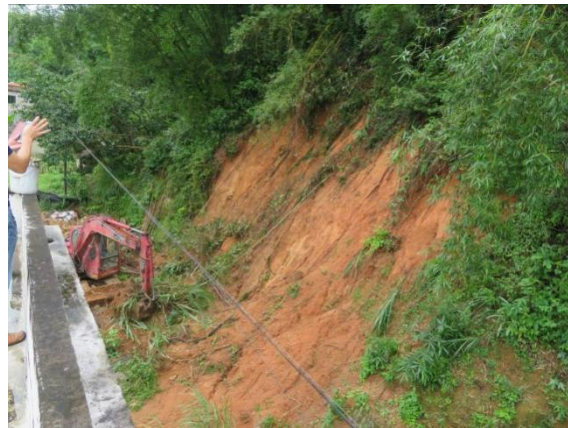

91

92

93 **Figure 2: Photos of the on-site investigation of shallow landslides.**

94 **2.2 Data Sources and Preprocessing**

95 **2.2.1 Sentinel - 1A/B SAR Data**

96 The SAR data used in this study are Sentinel - 1A/B C - band SAR images provided by the European Space  
97 Agency (ESA). The data acquisition period is from January 2024 to December 2025, with a total of 48 images.  
98 The imaging mode is Interferometric Wide (IW) mode, with a spatial resolution of 5 m (azimuth)  $\times$  20 m (range)  
99 and a temporal baseline of 12 days. The main parameters of the Sentinel - 1A/B SAR data are shown in Table 1.

100

101

102

103

104

105 **Table 1. Main Parameters of Sentinel - 1A/B SAR Data**

| Parameter          | Value                       |
|--------------------|-----------------------------|
| Satellite          | Sentinel - 1A/B             |
| Sensor Band        | C - band (5.405 GHz)        |
| Imaging Mode       | IW                          |
| Spatial Resolution | Azimuth: 5 m; Range: 20 m   |
| Swath Width        | 250 km                      |
| Temporal Baseline  | 12 days                     |
| Polarization       | VV + VH                     |
| Acquisition Period | January 2024- December 2025 |
| Number of Images   | 48                          |
| Orbit              | Ascending                   |

106 The preprocessing of Sentinel - 1A/B SAR data is carried out using the Sentinel Application Platform (SNAP)  
 107 software.

108 **2.2.2 Digital Elevation Model (DEM) Data**

109 The DEM data used in this study were collected and interpreted independently by the research institution. with a  
 110 spatial resolution of 10 m. The DEM data are mainly used for geometric correction of SAR images, generation of  
 111 topographic phase in interferograms, and extraction of topographic factors (slope, aspect, elevation, curvature) for  
 112 shallow landslide susceptibility assessment.

113 **2.2.3 Geological Data**

114 The geological data used in this study include the 1:50,000 geological map of the study area and the lithology and  
 115 geological structure reports provided by the local geological survey department. The lithology data are classified  
 116 into five categories: sandstone, shale, limestone, Quaternary loose deposits, and others. The geological structure  
 117 data mainly include the distribution of faults and folds. These geological data are digitized using ArcGIS software  
 118 to form vector data, which are used as important evaluation indices for shallow landslide susceptibility assessment.

119 **2.2.4 Hydrological Data**

120 The hydrological data used in this study include the river distribution data. The river distribution data are obtained  
 121 from the 1:100,000 topographic map, and the distance from each mapping unit to the nearest river is calculated

122 using ArcGIS software. These hydrological data are used to reflect the influence of rainfall and surface water on  
 123 shallow landslide occurrence.

124 **2.2.5 Human Activity Data**

125 The human activity data used in this study include the road distribution data. The road distribution data are  
 126 obtained from the 1:100,000 topographic map, and the distance from each mapping unit to the nearest road is  
 127 calculated using ArcGIS software. These human activity data are used to reflect the influence of human  
 128 engineering activities on shallow landslide occurrence.

129 **2.2.6 Normalized Differential Vegetation Index (NDVI)**

130 The vegetation coverage used in this study includes NDVI, which was obtained from the MODIS satellite images  
 131 provided by NASA.

132 **Table 2. Summary of data information and functions**

| Items             | Scale                                   | Function              | Source                |
|-------------------|-----------------------------------------|-----------------------|-----------------------|
| Sentinel - 1A/B   | 5 m× 20 m                               | Extracting surface    | European Space        |
| SAR Data          |                                         | deformation           | Agency (ESA)          |
| DEM               | 10 m× 10 m                              | Extraction of         | Interpreted           |
|                   |                                         | topographic factors   | independently         |
| Geological map    | 1:50,000                                | Extraction of         | Geological Survey     |
|                   |                                         | lithology and faults  | Department            |
| Topographic map   | 1:100,000                               | Extraction of river   | Geological Survey     |
|                   |                                         | and road distribution | Department            |
| NDVI              |                                         | Reflecting            | NASA                  |
|                   |                                         | Vegetation coverage   |                       |
| Landslide samples | 15 m <sup>3</sup> to 400 m <sup>3</sup> | Model training and    | Survey reports, field |
|                   |                                         | validation            | surveys, and remote   |
|                   |                                         |                       | sensing image         |
|                   |                                         |                       | interpretation        |
| Non-landslide     |                                         |                       |                       |

133 **3. Methods**

134 The research framework of this study is shown in Fig.3, which mainly includes 4 parts: SBAS - InSAR surface  
 135 deformation extraction, data preparation, machine learning modeling, verification, and comparison.

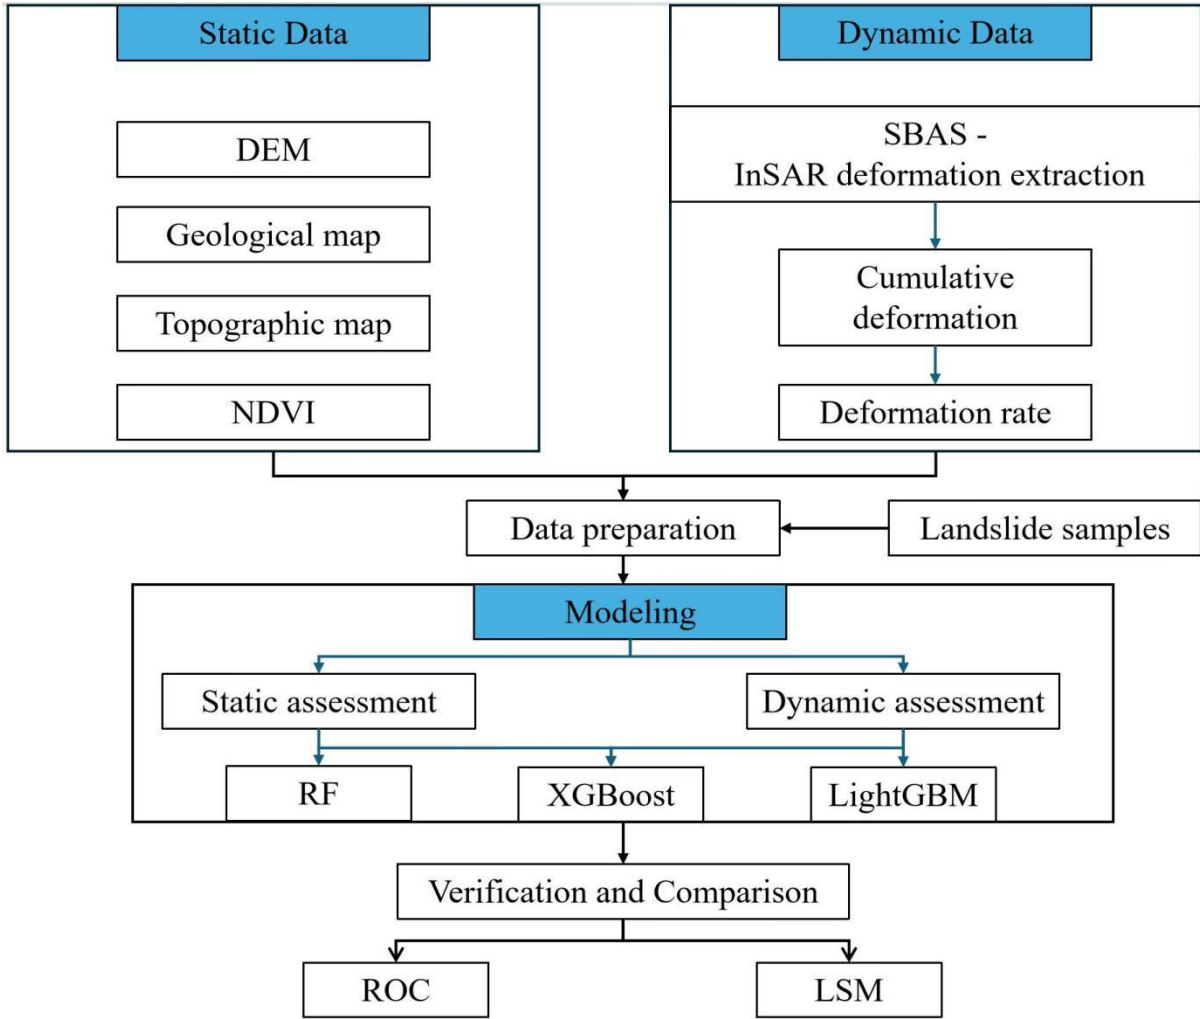

136

137 **Figure 3: Workflow of the study.**

138 **3.1 SBAS - InSAR Method for Surface Deformation Extraction**

139 The Small Baseline Subset (SBAS - InSAR) method is a Time-Series InSAR technique proposed by Berardino et  
 140 al. (2002). This method selects SAR image pairs characterized by small spatial and temporal baselines, so as to  
 141 form interferometric pairs. This approach can effectively mitigate the effects of temporal and spatial decorrelation  
 142 as well as atmospheric delay, thereby enhancing the accuracy of surface deformation measurement:

143 
$$\frac{N+1}{2} \leq M \leq \frac{N(N+1)}{2} \quad (1)$$

144 Where N is SAR images, M is interferograms.

145 Taking  $t_0$  as the reference moment,  $\varphi(t_i)$  denotes the differential phase at time  $t_i$  (where  $i = 1, 2, \dots, N$ ). For  
 146 the m-th differential interferogram generated between time instants  $t_a$  and  $t_b$  (with  $t_a > t_b$ ), the interference phase  
 147 value corresponding to any pixel  $(x, r)$  is:

148 
$$\delta\varphi_m(x, r) = \varphi(t_a, x, r) - \varphi(t_b, x, r) \approx \frac{4\pi}{\lambda} [d(t_a, x, r) - d(t_b, x, r)] \quad (2)$$

149 Where  $\delta\varphi_m(x, r)$  denotes the interferometric phase of pixel  $(x, r)$  in the m-th interferogram;  $\lambda$  represents the  
 150 wavelength of the satellite-borne radar; and  $d(t_a, x, r)$  as well as  $d(t_b, x, r)$  respectively stand for the cumulative  
 151 line-of-sight (LOS) deformations at times  $t_a$  and  $t_b$ , with both deformations referenced to the reference time  $t_0$ .

152 In accordance with the fundamental principles of the Small Baseline Subset Interferometric Synthetic  
 153 Aperture Radar (SBAS-InSAR) technique, its standard workflow comprises six core stages, which are specifically  
 154 defined as follows: data preprocessing, baseline network construction, interferogram generation, phase  
 155 unwrapping, surface deformation estimation, and geocoding:

$$156 \quad v_m = \frac{\varphi_m - \varphi_{m-1}}{t_m - t_{m-1}} \quad (3)$$

157 Assuming that the deformation rate between two adjacent interferograms is denoted as  $v_k$ ,  $k$  and  
 158  $k-1$  represent the serial numbers of SAR images, respectively). the value of the  $m$ -th differential interferogram  
 159 can be reformulated as follows:

$$160 \quad \delta\varphi_m = \sum_{k=t, m+1}^{t_A, m} (t_k - t_{k-1}) v_k \quad (4)$$

161 In other words, this value represents the integral of the deformation rate  $v_k$  over each time period  
 162 corresponding to the time intervals between the master and slave SAR images. On this basis, Equation (4) can be  
 163 rewritten into the following matrix form:

$$164 \quad Bv = \delta\varphi \quad (5)$$

165 Equation (5) corresponds to a matrix (denoted as B) with a dimension of  $M \times N$ . When there are multiple  
 166 small baseline sets involved, the matrix B exhibits rank deficiency. To address this issue, the Singular Value  
 167 Decomposition (SVD) method can be employed to decompose the coefficient matrix  $B$ —a process that facilitates  
 168 the joint inversion of multiple small baseline sets. Accordingly, a least squares solution that achieves the  
 169 minimization of the norm associated with the cumulative deformation variable can be derived. By virtue of this  
 170 solution, the accurate estimation of the deformation variable is rendered feasible.

171 **Key SBAS-InSAR processing parameters implemented are as follows: Multi-looking was set to  $10 \times 2$**   
 172 **(azimuth  $\times$  range), with this higher azimuth multi-looking factor chosen to maximize noise reduction while**  
 173 **preserving sufficient spatial resolution, specifically optimized for our dense vegetation study area. The spatial**  
 174 **baseline was constrained to  $< 300$  m and the temporal baseline to  $< 24$  days, with these tight constraints**  
 175 **implemented to minimize both spatial and temporal decorrelation effects, and additional quality control applied**  
 176 **to exclude interferometric pairs with coherence below the threshold. A coherence threshold of 0.3 was used to**  
 177 **exclude low-coherence pixels, with additional coherence-based quality control applied to remove poor-quality**  
 178 **interferometric pairs. Phase unwrapping was performed using the SNAPHU algorithm with a cost threshold of**  
 179 **0.2, selected for its robust performance in complex terrain, with additional error detection and correction**  
 180 **procedures. Atmospheric phase screen (APS) correction included Gaussian filtering (500 m window) and linear**  
 181 **temporal detrending, a two-step approach that effectively mitigates atmospheric phase screen effects common in**  
 182 **subtropical regions. A stable reference point with a deformation rate  $< 0.5$  cm/year was selected in the western**  
 183 **low-relief area through multi-criteria analysis. A temporal Gaussian filter (window = 3) was applied to reduce**  
 184 **residual noise while preserving genuine deformation signals.**

185 In addition to these core parameters, we implemented four advanced processing techniques to further  
 186 improve data quality. First, we applied a homogeneous filtering method specifically designed for vegetated areas  
 187 to optimize interferometric phase quality (Jiang et al., 2015). This technique effectively reduces noise while  
 188 preserving coherent signals in areas with dense vegetation, significantly improving phase continuity and overall  
 189 data quality. Second, we implemented an interferometric phase closure method to identify and remove unwrapping  
 190 errors (Biggs et al., 2007). This quality control step systematically detects inconsistencies in phase measurements,  
 191 allowing us to correct or exclude erroneous data points, thereby enhancing the reliability of our deformation results.

192 Third, to address small voids in unwrapped interferograms caused by decorrelation, we applied a spatially adaptive  
193 interpolation method (Ferretti et al., 2011). This approach preserves phase continuity while filling small gaps,  
194 improving the spatial density of our deformation results without compromising accuracy. Fourth, we implemented  
195 phase linking (phase triangulation) to retrieve consistent wrapped phase time-series from the full stack of SAR  
196 images, effectively mitigating decorrelation effects in densely vegetated areas by leveraging all possible  
197 interferometric pairs (Guarnieri & Tebaldini, 2008; Mirzaee et al., 2023). This technique constructs a full complex  
198 coherence matrix to estimate an optimized wrapped time series, significantly improving phase quality in regions  
199 with low coherence.

## 200 **3.2 Data preparation**

### 201 **3.2.1 Landslide Inventory and modeling strategy**

202 The historical landslide data used in this study are mainly obtained from the local geological disaster survey  
203 reports, field surveys, and remote sensing image interpretation. A total of 368 historical shallow landslide points  
204 were collected (as shown in Fig.1), including the location, scale, and occurrence time of the landslides. An equal  
205 number of non-landslide samples were selected randomly from the “relatively stable” area. A k-fold cross-  
206 validation approach (with k set to 5 in the present study) was employed to elaborate on the models’ capability in  
207 classifying independent test data. Specifically, the data were randomly divided into k mutually exclusive subsets;  
208 in each iteration, one subset was utilized for model testing, whereas the remaining k-1 subsets were combined and  
209 used for model training (James et al., 2013).

### 210 **3.2.2 Conditioning factors and mapping unit**

211 The conditioning factors selected in the study consisted of static and dynamic factors. Static factors included slope,  
212 aspect, elevation, curvature, distance to faults (DTF), distance to streams (DTS), distance to roads (DTR), and  
213 NDVI (Fig.4). Dynamic factors included cumulative deformation and deformation rate (Fig.5). The specific  
214 indexes and their classification standards are shown in Table 3.

215 Prior to LSA, a suitable mapping unit must first be determined. Grid cells and slope units are two of the most  
216 widely used mapping units, and a detailed comparison of the two can be found in other relevant literature (Lie et  
217 al.,2024; Liu et al.,2024). In terms of preserving topographic conditions and distinguishing landslide locations, slope  
218 units exhibit superior performance. Accordingly, slope units were adopted as the mapping unit, and the study area  
219 was divided into 10426 units. And the mean value in the unit was counted as the representative value of the unit.

220 The study utilized ArcGIS 10.7 for the processing of thematic map generation, unit division, and data analysis,  
221 including reclassification, distance analysis, and regional analysis etc.

222

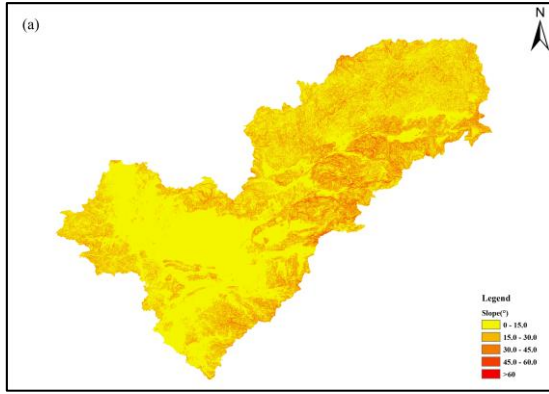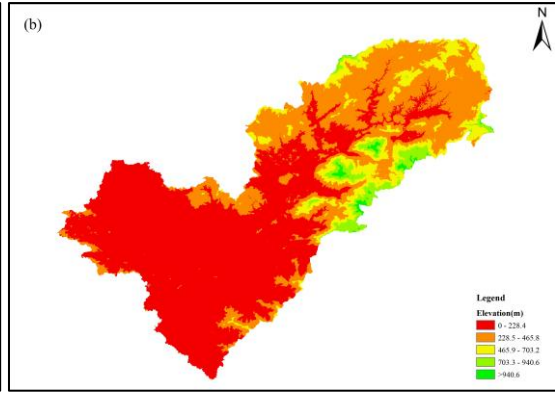

223

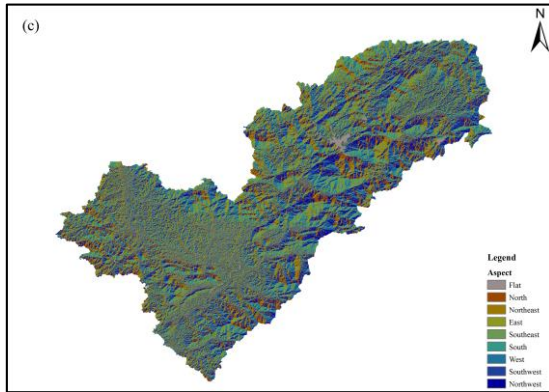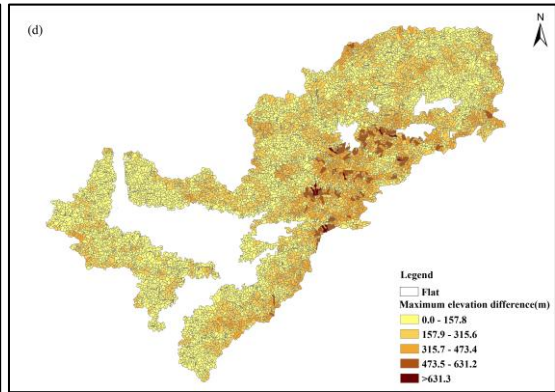

224

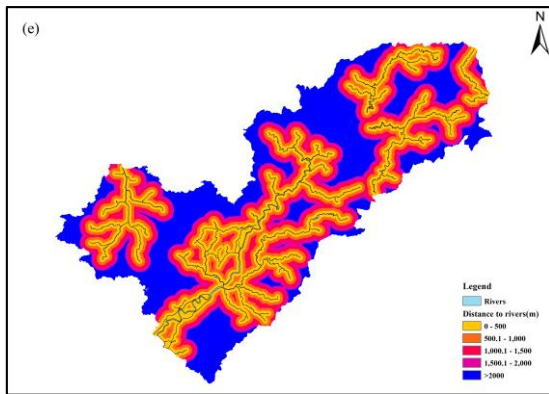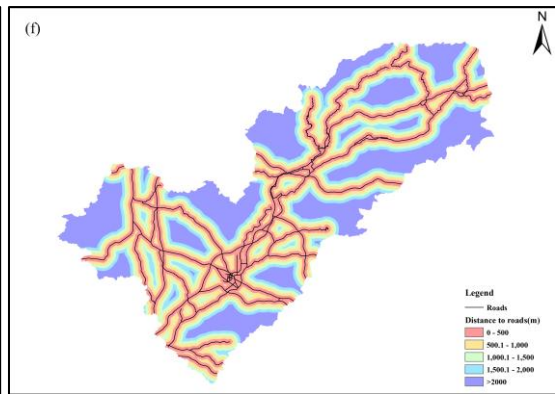

225

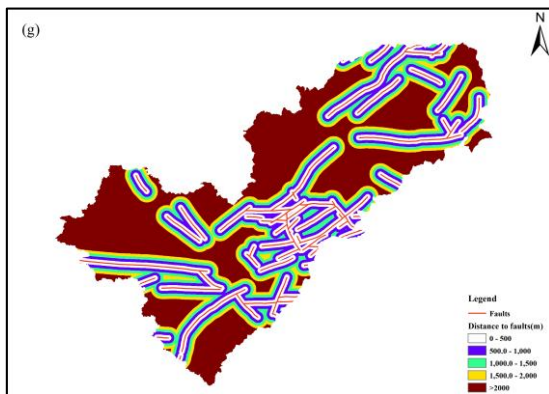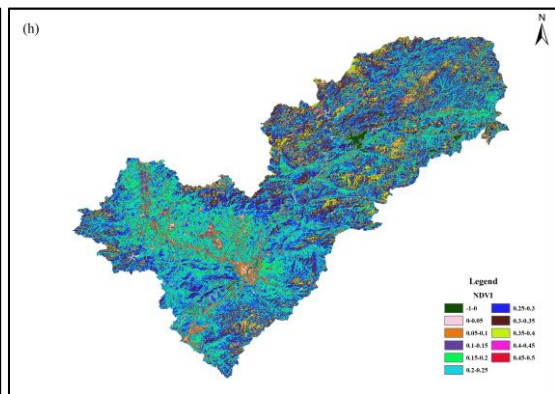

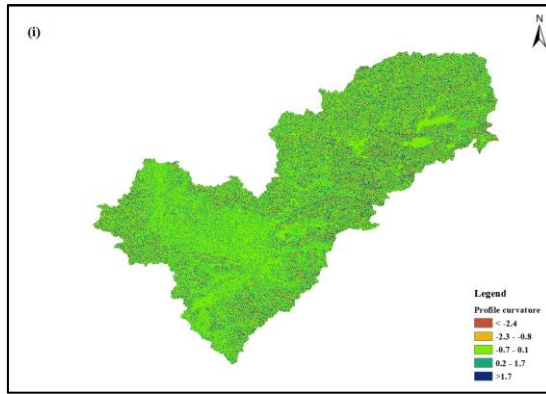

226

227

228

Figure 4: Thematic map of static factors:(a) Slope; (b) Elevation; (c) Aspect; (d) Maximum elevation difference; (e) DTS; (f) DTR; (g) DTF; (h) NDVI; (i) Profile curvature.

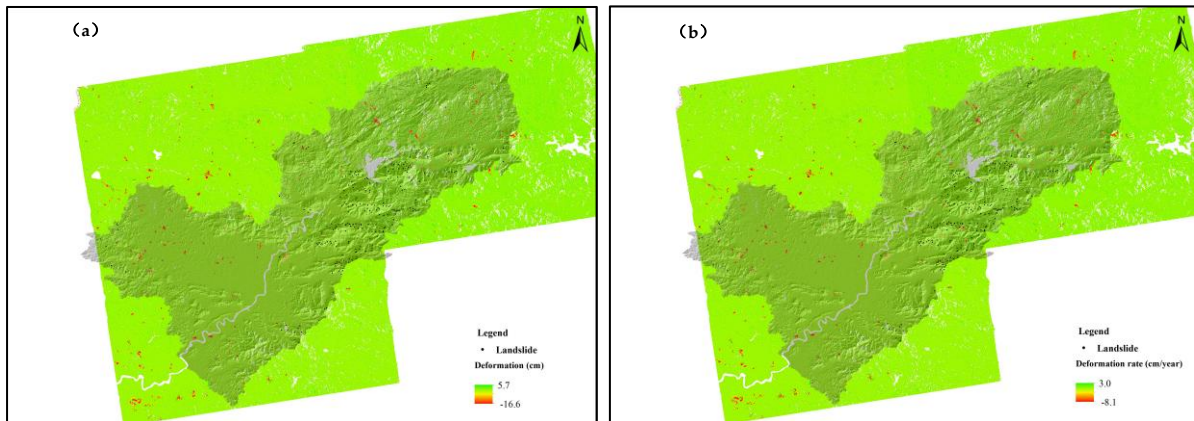

229

230

Figure 5: Thematic map of dynamic factors: (a) Deformation; (b) Deformation rate.

231

Table 3. Shallow landslide susceptibility conditioning factors and classification standards

| Category       | Conditioning factors | Zone        |
|----------------|----------------------|-------------|
| Static factors | Slope ( $^{\circ}$ ) | 0~15        |
|                |                      | 15~30       |
|                |                      | 30~45       |
|                |                      | 45~60       |
|                |                      | >60         |
|                | Aspect               | Flat        |
|                |                      | North       |
|                |                      | East        |
|                |                      | Northeast   |
|                |                      | Southeast   |
|                |                      | South       |
|                | Elevation(m)         | Southwest   |
|                |                      | West        |
|                |                      | 0~228.4     |
|                |                      | 228.5~465.8 |
|                |                      | 465.9~703.2 |

|                                 |                             |             |
|---------------------------------|-----------------------------|-------------|
|                                 |                             | 703.3~940.6 |
|                                 |                             | >940.6      |
|                                 | DTF(m)                      | 0~500       |
|                                 |                             | 500~1000    |
|                                 |                             | 1000~1500   |
|                                 |                             | 1500~2000   |
|                                 |                             | >2000       |
|                                 |                             |             |
|                                 | DTS(m)                      | 0~500       |
|                                 |                             | 500~1000    |
|                                 |                             | 1000~1500   |
|                                 |                             | 1500~2000   |
|                                 |                             | >2000       |
|                                 | DTR(m)                      | 0~500       |
|                                 |                             | 500~1000    |
|                                 |                             | 1000~1500   |
|                                 |                             | 1500~2000   |
|                                 |                             | >2000       |
|                                 | Profile curvature           | <-2.4       |
|                                 |                             | -2.3~-0.8   |
|                                 |                             | -0.7~1      |
|                                 |                             | 0.1~1.7     |
|                                 |                             | >1.7        |
| Maximum elevation difference(m) | 0~157.8                     |             |
|                                 | 157.9~315.6                 |             |
|                                 | 315.7~473.4                 |             |
|                                 | 473.5~631.2                 |             |
|                                 | >631.3                      |             |
| NDVI                            | -1~0.5                      |             |
| Dynamic factors                 | Cumulative deformation (cm) | -16.6~5.7   |
|                                 | Deformation rate (cm/y)     | -8.1~3.0    |

### 232 3.3 Modeling

#### 233 3.3.1 RF

234 The Random Forest (RF) algorithm, an ensemble learning method composed of multiple tree-based classifiers,  
235 has gained widespread recognition and application in LSA (Li et al.,2024) . During the model training phase, K  
236 sample subsets are generated from the original training dataset through the bootstrap sampling technique. The  
237 samples that are not included in these subsets, known as out - of - bag (OOB) data, serve as a valuable resource

238 for internal error assessment of the model. Each of these K sample subsets is used to train an individual decision  
239 tree, which acts as a base learner, resulting in K distinct classification outcomes (Breiman et al.,2001). For the final  
240 classification result, a voting mechanism is adopted instead of a simple weighting approach—each decision tree's  
241 classification result is treated as a vote, and the category that receives the majority of votes is determined as the  
242 ultimate prediction of the RF model. A key advantage of the RF algorithm is its inherent ability to mitigate over-  
243 fitting.

### 244 **3.3.2 LGBM**

245 The Light Gradient Boosting Machine (LGBM) stands out as a high-efficiency, tree-structured gradient boosting  
246 algorithm (Ke et al.,2017). Distinguishing itself from conventional approaches, it adopts a leaf-wise tree growth  
247 mechanism with restricted depth, replacing the traditional level-wise strategy—an innovation that simultaneously  
248 mitigates overfitting and enhances predictive accuracy. The core of the leaf-wise method lies in prioritizing the  
249 leaf node with the maximum gain for splitting at each iteration. In comparison to the level-wise strategy, which  
250 expands all nodes at a given depth uniformly, the leaf-wise approach minimizes more of the errors associated with  
251 level-wise growth when the total number of splits is identical. Additionally, it reduces redundant computations  
252 involving leaf nodes with low gain, thereby guaranteeing the model's computational efficiency without  
253 compromising its accuracy.

### 254 **3.3.3 XGBoost**

255 XGBoost, a robust machine learning framework designed to enhance the scalability of tree-based boosting  
256 algorithms, has emerged as a leading and widely adopted method in recent years across various research and  
257 application domains (Chen et al.,2015; Zhang e et al.,2023). By leveraging gradient descent optimization to minimize  
258 the predefined loss function, the algorithm constructs a predictive model through an ensemble of weak  
259 classification trees within a boosting framework. The core idea lies in fitting well the residual of the previous  
260 prediction by learning a new function in each iteration; on this basis, it further calculates the score corresponding  
261 to each node in accordance with the sample characteristics.

262 In this study, three machine learning algorithms were employed to model the two scenarios (static factor only  
263 and dynamic-static factors coupling) separately, resulting in a total of six models.

### 264 **3.3.4 Hyperparameter Optimization and Settings**

265 Hyperparameter optimization plays a crucial role in enhancing the performance of machine learning models,  
266 as it seeks to determine the optimal hyperparameter combinations based on predefined evaluation metrics (Karl  
267 et al., 2023). Common strategies for hyperparameter tuning include grid search, random search, and Bayesian  
268 optimization (Agrawal et al., 2021). In this study, grid search coupled with 5-fold cross-validation was  
269 implemented on the training dataset to optimize hyperparameters. This strategy efficiently explores the  
270 hyperparameter space and reduces the risk of overfitting. The final optimized hyperparameters for each model are  
271 shown in Table 4.

272

273

274

Table 4. Hyperparameters of machine learning

| Model   | Hyperparameters                                                                                               |
|---------|---------------------------------------------------------------------------------------------------------------|
| RF      | n_estimators = 200, max_depth = 12, min_samples_split = 5, min_samples_leaf = 2                               |
| LGBM    | learning_rate = 0.05, n_estimators = 300, max_depth = 10, num_leaves = 31, subsample = 0.8                    |
| XGBoost | learning_rate = 0.05, n_estimators = 300, max_depth = 8, subsample = 0.8, colsample_bytree = 0.8, gamma = 0.1 |

### 276 3.4 Verification and comparison

277 The ROC curve is a conventional method for validating the outcomes of LSA. The area under the ROC curve  
 278 (AUC, ranging from 0~1) is used to quantify the predictive accuracy of the assessment (Hodasová et al.,2021; Liang  
 279 et al.,2021; Liang et al.,2023).

280 The landslide susceptibility map (LSM) was reclassified into five levels as very low(0-0.2), Low(0.2-0.4),  
 281 moderate(0.4-0.6), high(0.6-0.8), very high (0.8-1). To verify the reliability of the susceptibility map, historical  
 282 landslide points and the size distribution of areas for each susceptibility level were applied (Liang et al.,2021).

283 The AUC, sensitivity, specificity, and LSM were applied to verify and compare the effectiveness of different  
 284 models in the study.

## 285 4. Results

### 286 4.1 Surface Deformation Results from SBAS - InSAR

287 Using the SBAS - InSAR method, we obtained the average annual surface deformation rate map of the study area  
 288 from January 2024 to December 2025. The results show that the surface deformation in the study area is spatially  
 289 heterogeneous, with deformation rates ranging from -8.1cm/year (subsidence) to 3 cm/year (uplift). Most areas  
 290 have stable surface conditions (deformation rate < 2cm/year, the green area in Fig.6), accounting for  
 291 approximately 75% of the total study area. The moderately unstable areas (deformation rate: -1 to -2 cm/year, the  
 292 yellow area in Fig.6) account for 20%, while the highly unstable areas (-2 to -8 cm/year, the red area in Fig.4)  
 293 account for 5%.

294 The highly unstable areas are mainly distributed in the following locations:

- 295 1. It mainly focuses on the areas of Lvian Town, the northern part of Liangkou Town, and the northern part  
 296 of Wenquan Town.
- 297 2. Along the roads, where road construction has disturbed the slope stability, leading to obvious **deformation**.
- 298 3. Near the fault zones in the eastern part of the study area, where the geological structure is unstable, leading  
 299 to continuous **deformation**.

300 These highly unstable areas are consistent with the field investigation (Fig.7), indicating that the InSAR-  
 301 derived surface deformation data can effectively identify potential shallow landslide risk areas. Besides, the  
 302 majority of these potential geohazard risks are closely associated with human engineering activities—including  
 303 road construction, residential development, and industrial facility construction—and such hazards typically  
 304 exhibit a small spatial scale.

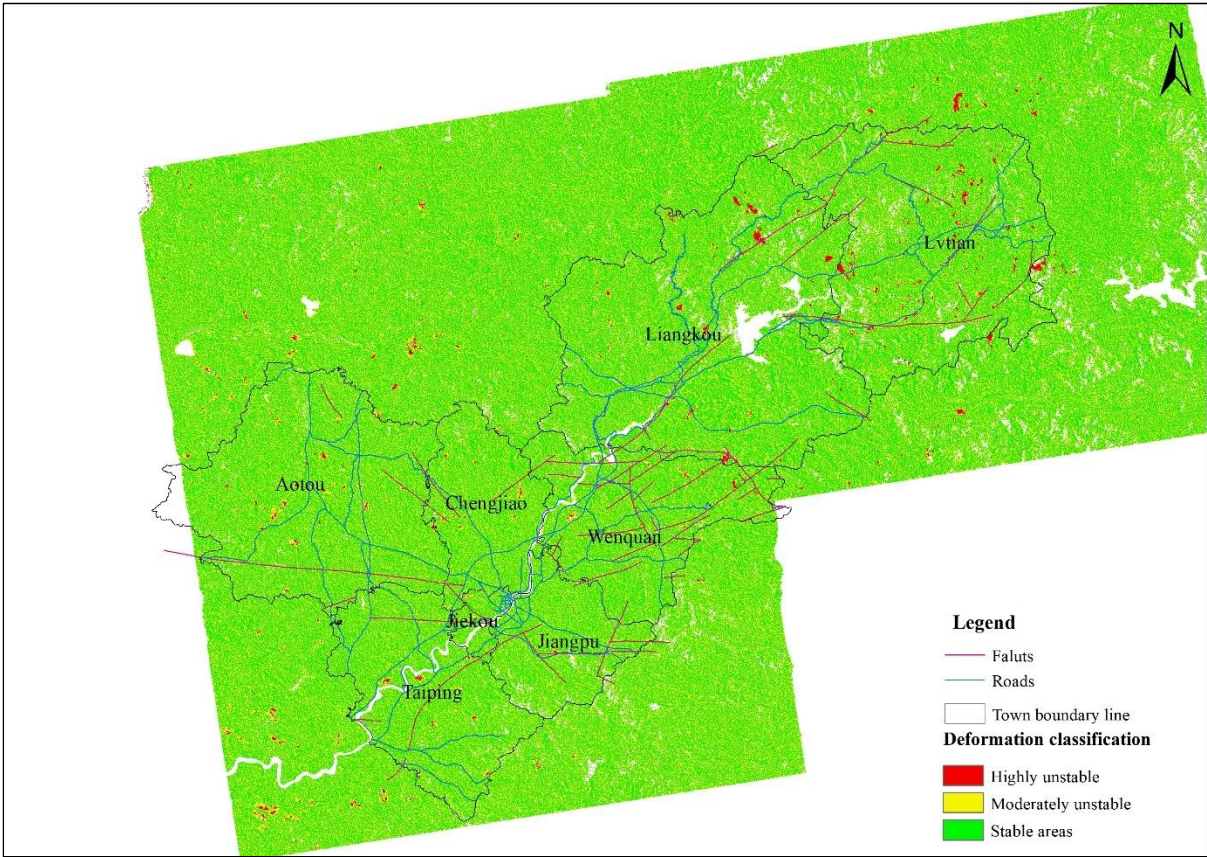

305

306 **Figure 6: Surface Deformation Rate Map of the Study Area.**

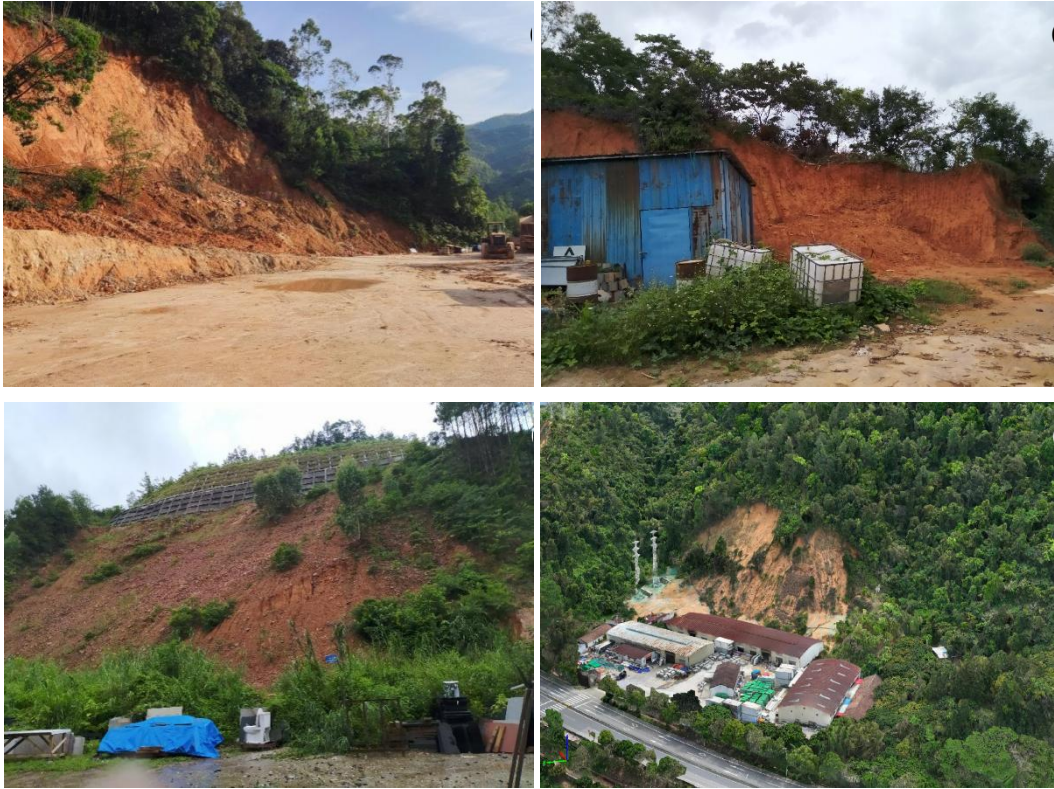

307

308

309 **Figure 7: Field investigation:(a) slope collapse on 2025.6.17;(b) slope collapse on 2025.6.18 ;(c) landslide on 2025.8.20;(d)**  
 310 **landslide on 2025.8.20.**

311 **4.2 Model's Performance**

312 The performance of the models was evaluated using confusion matrices, with the detailed results presented in  
 313 Table 5~6 and Fig.8. For the training dataset, the SAR+XGBoost model achieved the highest sensitivity (0.899),  
 314 specificity (0.895), accuracy (0.897), and AUC (0.951), followed by the SAR+LGBM model with the values of  
 315 0.872, 0.874, 0.873, and 0.937. The RF model performed the worst with the values of 0.821, 0.830, 0.825, and  
 316 0.894. While the performance of the LGBM model is average, with the values of 0.851, 0.833, 0.842, and 0.913.  
 317 The AUC values of all models were all close to 0.9. Among them, the SAR + XGBoost model achieved 0.951,  
 318 which indicates that the model has achieved an excellent effect in predicting landslide susceptibility. After the  
 319 integration based on SAR technology, the overall prediction accuracy of the model has improved to a certain  
 320 extent.

321 **Table 5. Models' performance in training**

| Indexs      | XGBoost | LGBM  | RF    | SAR+XGBoost | SAR+LGBM | SAR+RF |
|-------------|---------|-------|-------|-------------|----------|--------|
| TP          | 1305    | 1260  | 1215  | 1330        | 1290     | 1270   |
| TN          | 1230    | 1225  | 1220  | 1315        | 1285     | 1270   |
| FP          | 240     | 245   | 250   | 155         | 185      | 200    |
| FN          | 175     | 220   | 265   | 150         | 190      | 210    |
| Sensitivity | 0.882   | 0.851 | 0.821 | 0.899       | 0.872    | 0.858  |
| Specificity | 0.837   | 0.833 | 0.830 | 0.895       | 0.874    | 0.864  |
| Accuracy    | 0.859   | 0.842 | 0.825 | 0.897       | 0.873    | 0.861  |
| AUC         | 0.933   | 0.913 | 0.894 | 0.951       | 0.937    | 0.924  |

322 In terms of validation, the SAR+XGBoost model also outperformed the others, reaching 0.847, 0.838, 0.842,  
 323 and 0.939, whereas the XGBoost obtained 0.819, 0.811, 0.815, and 0.928. The RF model also performed the worst  
 324 with the values of 0.750, 0.784, 0.767, and 0.855. While the performance of the LGBM model is average, with  
 325 the values of 0.806, 0.797, 0.801, and 0.886. Compared with the training set, the performance of all models has  
 326 declined to varying degrees, and the AUC value of the RF model has dropped below 0.855 but improved to 0.886  
 327 after merging SAR technology. After the integration based on SAR technology, the overall prediction accuracy  
 328 of the model has improved to a certain extent.

329 **Table 6. Models' performance in validation**

| Indexs      | XGBoost | LGBM  | RF    | SAR+XGBoost | SAR+LGBM | SAR+RF |
|-------------|---------|-------|-------|-------------|----------|--------|
| TP          | 295     | 290   | 270   | 305         | 300      | 280    |
| TN          | 300     | 295   | 290   | 310         | 305      | 300    |
| FP          | 70      | 75    | 80    | 60          | 65       | 70     |
| FN          | 65      | 70    | 90    | 55          | 60       | 80     |
| Sensitivity | 0.819   | 0.806 | 0.750 | 0.847       | 0.833    | 0.778  |
| Specificity | 0.811   | 0.797 | 0.784 | 0.838       | 0.824    | 0.811  |
| Accuracy    | 0.815   | 0.801 | 0.767 | 0.842       | 0.829    | 0.795  |
| AUC         | 0.928   | 0.886 | 0.855 | 0.944       | 0.910    | 0.886  |

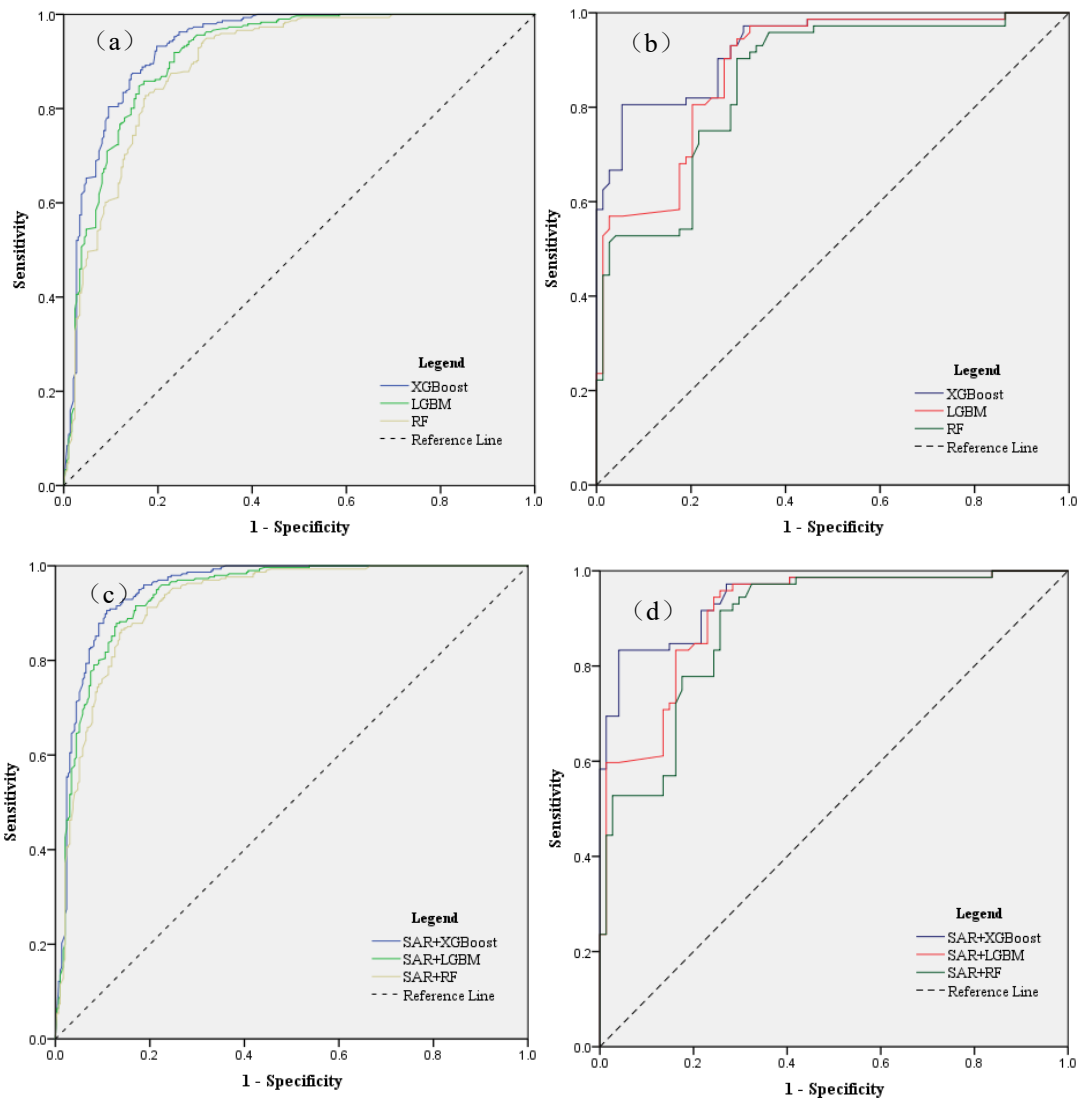

330

331

332 **Figure 8: Analysis of ROC curve: (a) traditional machine learning models in the training dataset; (b) traditional**  
 333 **machine learning models in the validation dataset; (c) SAR merged models in the training dataset; (d) SAR merged**  
 334 **models in the validation dataset.**

### 335 4.3 Landslide Susceptibility Map

336 After model training and validation, the landslide susceptibility index (LSI) of each slope unit was calculated, and  
 337 the landslide susceptibility map of the whole study area was generated. The statistical results of the susceptibility  
 338 levels are shown in Fig.9. A logically sound landslide susceptibility map must adhere to two fundamental criteria:  
 339 (1) the density of landslide samples should exhibit a positive correlation with increasing susceptibility classes,  
 340 with the majority of landslide samples concentrated in the highest susceptibility zone; (2) the map should display  
 341 spatial continuity and smoothness, with the very high-susceptibility class occupying a relatively small proportion  
 342 of the total study area (Ado et al.,2022).

343 The traditional machine learning models consistently predict a relatively high proportion of moderately  
 344 susceptible areas, with all models yielding values exceeding 28%. In particular, the LGBM model achieved a rate  
 345 of approximately 30%. For the SAR+XGBoost model, the distribution of predicted susceptibility classes was:  
 346 20.88% (very low), 28.46% (low), 22.05% (moderate), 19.10% (high), and 9.51% (very high). While the XGBoost

347 model occupied 14.72% (very low), 21.80% (low), 28.01% (moderate), 23.01% (high), and 12.46(very high),  
 348 respectively. The RF model occupied 13.12% (very low), 20.62% (low), 28.66% (moderate), 25.83(high), and  
 349 11.77(very high), respectively. While the SAR+RF model occupied 16.77% (very low), 21.24% (low), 26.53%  
 350 (moderate), 23.70%(high), and 11.77% (very high), respectively.

351 As illustrated in Fig.10, the landslide samples (represented by dark spots) are predominantly distributed in  
 352 the red-colored regions (corresponding to high/very high susceptibility), while a few samples are scattered  
 353 improperly in the green area (corresponding to low/very low susceptibility). Furthermore, the high and very high  
 354 susceptibility zones are spatially concentrated in the eastern region, which is consistent with the actual spatial  
 355 distribution of historical landslides. This subregion is characterized by steep slopes (slope>30°) with substantial  
 356 elevation differences (MED>300), close proximity to the adjacent road network (DTR<500), and a nearby  
 357 distribution of geological faults. The low and very low susceptibility zones are spatially concentrated in the  
 358 western region. This region is characterized by relatively gentle terrain with minimal elevation variations and a  
 359 sparse distribution of faults. Collectively, these observations demonstrate that the susceptibility maps generated  
 360 by the 6 models are generally logically consistent and reliable, but there are certain differences. Furthermore, as  
 361 illustrated in Fig.11, the high-deformation zones identified via SAR remote sensing do not fully overlap with the  
 362 high-susceptibility areas delineated by the model; correspondingly, the stable zones detected by SAR technology  
 363 also exhibit incomplete spatial overlap with the low-susceptibility areas. The highly unstable area is located in the  
 364 plain area of the residential zone. **The mismatch between high-deformation zones and high-susceptibility areas  
 365 can be primarily attributed to different deformation mechanisms in distinct geomorphological settings. The highly  
 366 unstable areas distributed in residential plains are dominated by anthropogenic vertical subsidence related to  
 367 groundwater extraction and urban consolidation, rather than slope movements associated with landslides.**

368 Besides, to characterize the spatiotemporal evolution of slope deformation, a time-series deformation  
 369 analysis was conducted based on quarterly SBAS-InSAR results from January 2024 to September 2025(Fig.12).  
 370 Furthermore, monitoring points were selected from different levels of susceptibility areas for monthly deformation  
 371 analysis (Fig.13). It can be observed that the deformation in the high/very high susceptibility areas occurs mainly  
 372 from April to September each year, which coincides with the flood season in terms of time. While the low/very  
 373 low susceptibility areas were basically stable. Slopes that eventually failed exhibited accelerated deformation  
 374 during or immediately after heavy rainfall periods, while stable slopes maintained relatively low and steady  
 375 deformation rates throughout the monitoring period.

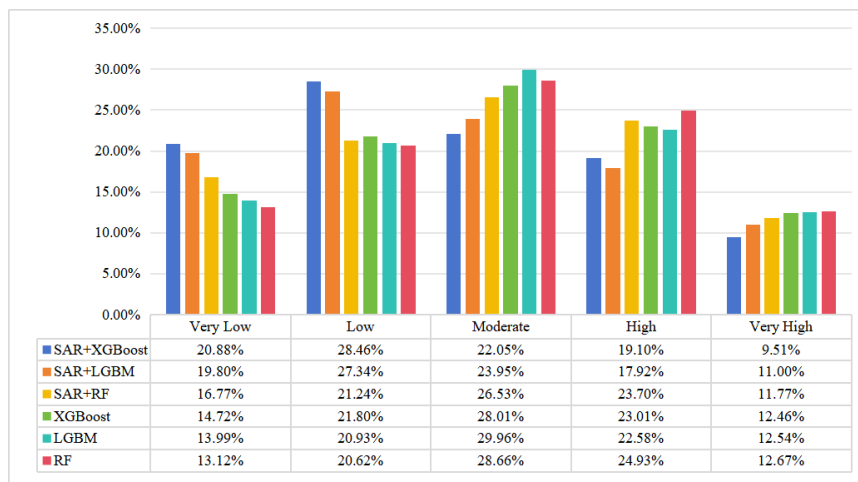

376

377 **Figure 9: Percentages of areas in LSM.**

378

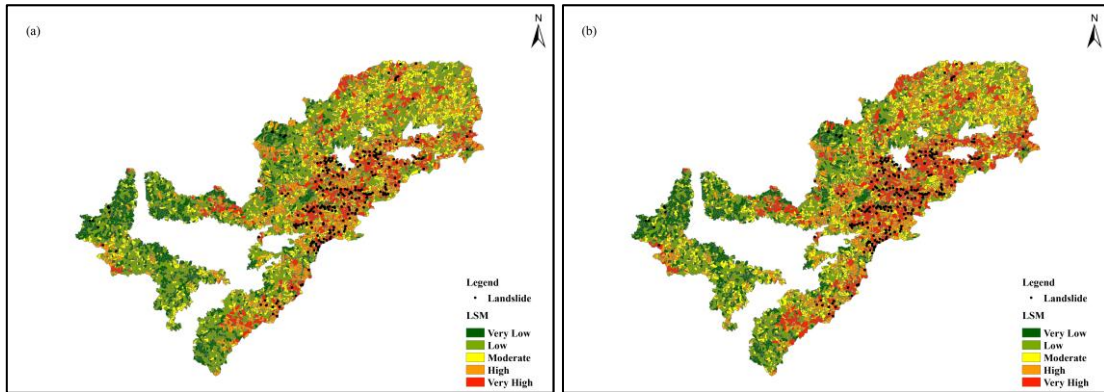

379

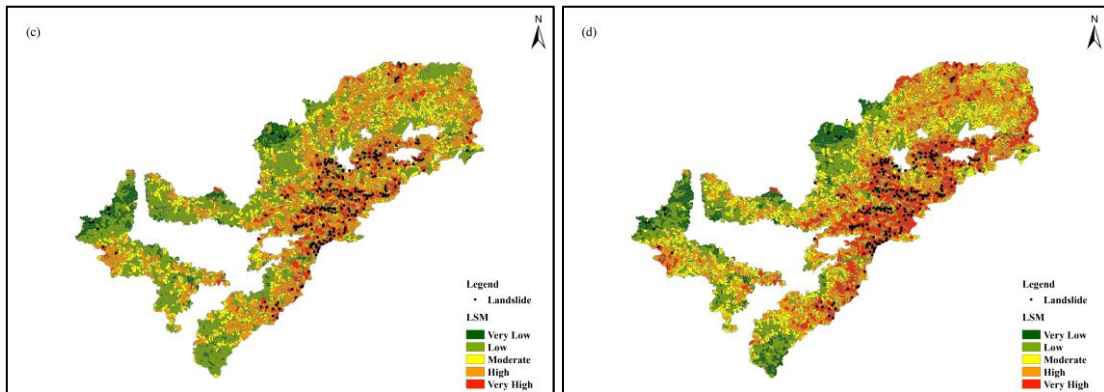

380

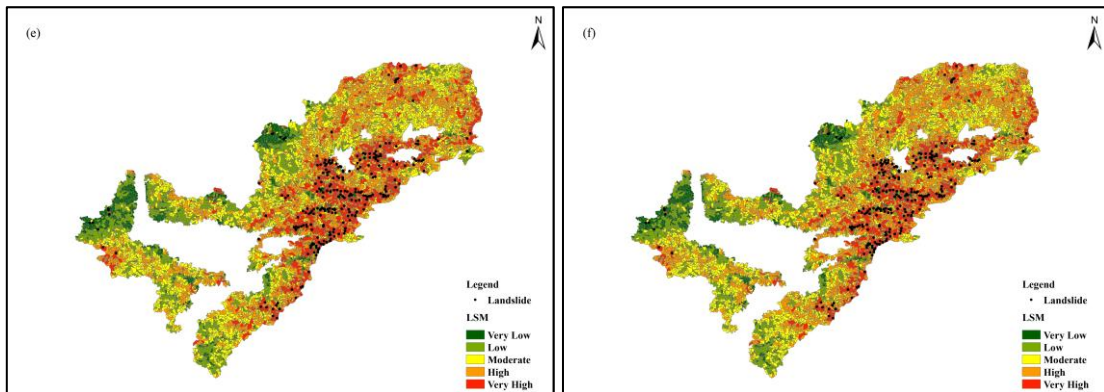

381 **Figure 10: LSM produced by: (a) SAR+XGBoost; (b) SAR+LGBM; (c) SAR+RF; (d) XGBoost; (e) LGBM; (f) RF.**

382

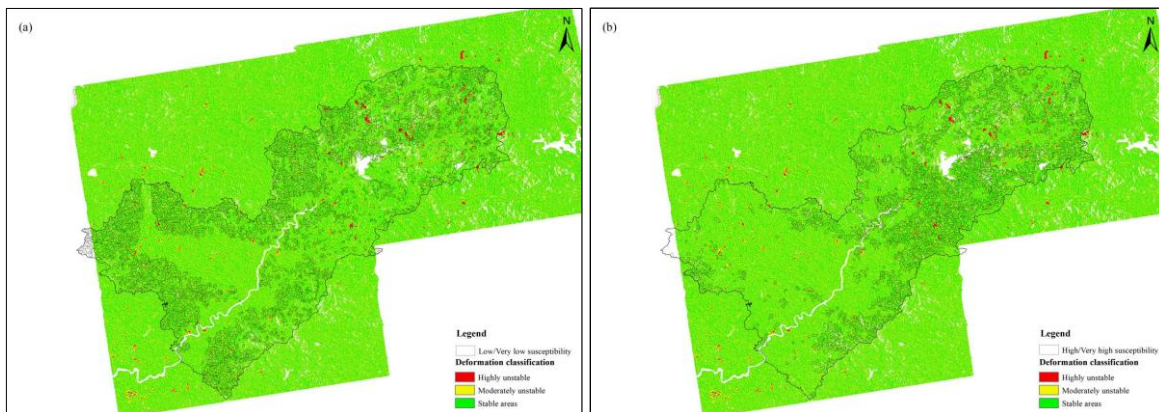

383 **Figure 11: LSM produced by SAR+XGBoost: (a) Low/very low susceptibility; (b) High/very high susceptibility.**

384

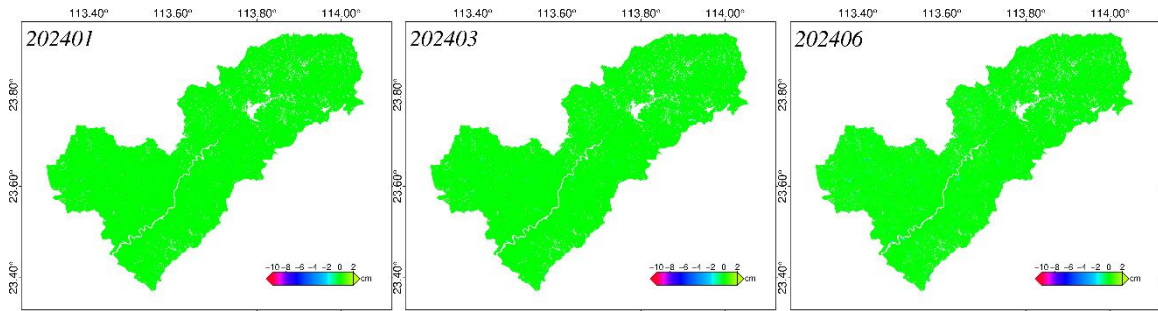

385

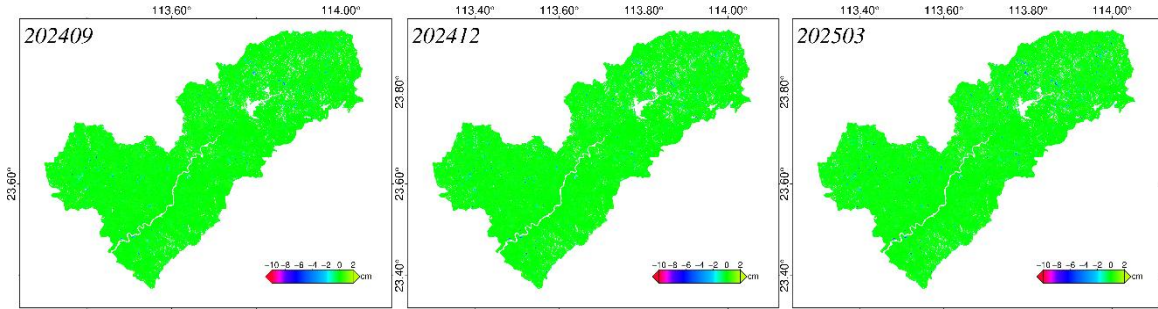

386

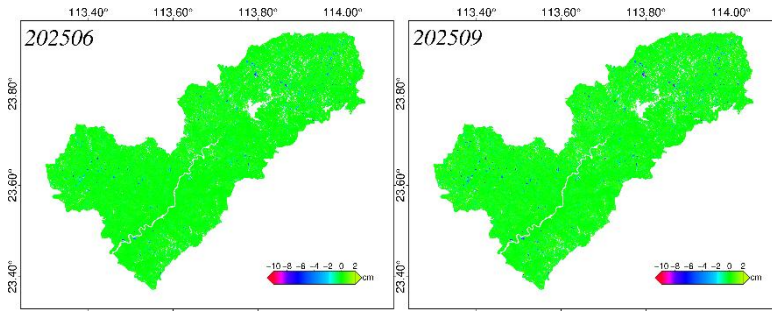

387

Figure 12: Maps of Temporal deformation (2024.1~2025.9).

388

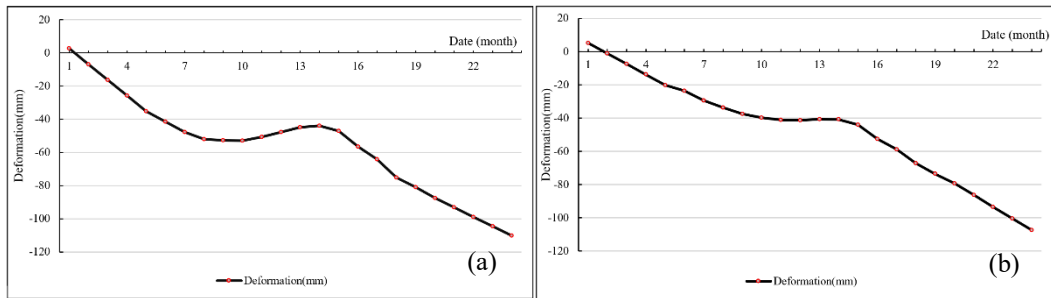

389

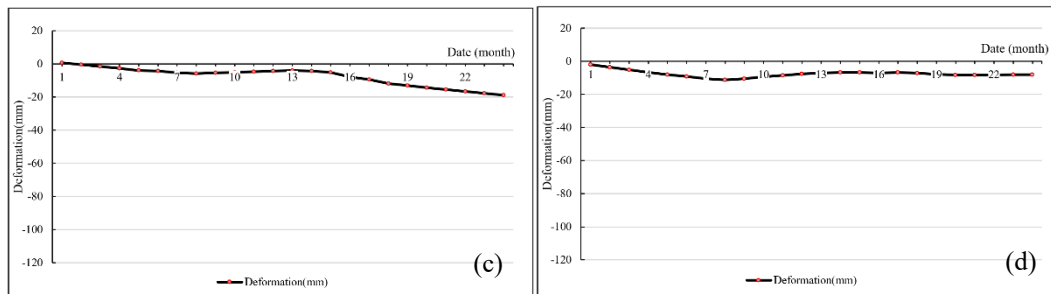

390

Figure 13: Maps of Temporal deformation for specific areas: (a-b) High/very high susceptibility areas; (c-d) Low/very low susceptibility areas.

391

392

393

394 **4.4 Analysis of the Importance of Conditioning Factors**

395 To quantify the critical contribution of dynamic factors to landslide susceptibility prediction, the Gini index—an  
 396 indicator that measures the correlation between predictive variables and model outputs—was employed in this  
 397 study, and the results were normalized (Dou et al.,2023; Ye et al.,2022). In the static factor analysis, the key  
 398 contributing variables were identified as the slope, DTR, MED, and DTF, with these factors exhibiting relatively  
 399 high weight coefficients of 0.45, 0.19, 0.14, and 0.12, respectively (Fig.12; Table 7). By contrast, DTS, PC,  
 400 elevation, and aspect yielded lower weight coefficients, indicating that these factors exert a relatively minor  
 401 influence on landslide occurrence.

402 After coupling with SAR technology, the key contributing variables were identified as the slope, DTR,  
 403 Deformation rate (DR), and DTF, with these factors exhibiting relatively high weight coefficients of 0.3, 0.25,  
 404 0.12, and 0.1, respectively (Fig.12; Table 8). By contrast, MED, DTS, elevation, and PC yielded lower weight  
 405 coefficients, indicating that these factors exert a relatively minor influence on landslide occurrence.

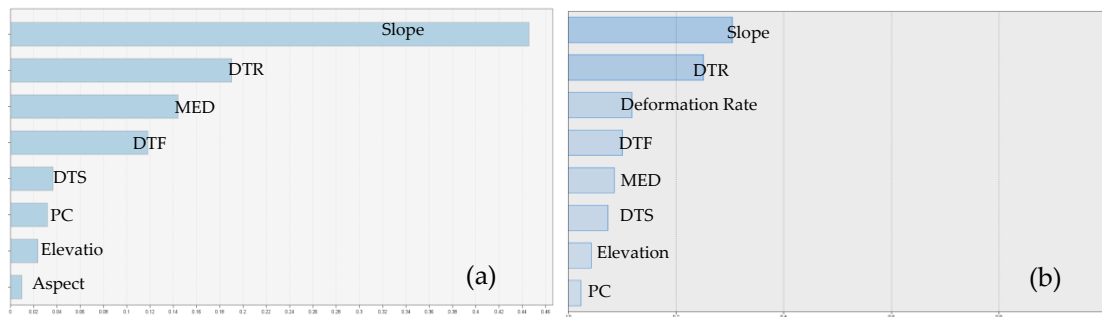

406  
 407 **Figure 14: Factor Importance Analysis: (a) Static factor analysis; (b) Dynamic and static factor coupling analysis.**

408 **Table 7 Static Factor Importance Analysis**

| Factors | Slope | DTR  | MED  | DTF  | DTS  | PC   | Elevation | Aspect |
|---------|-------|------|------|------|------|------|-----------|--------|
| Gini    | 0.45  | 0.19 | 0.14 | 0.12 | 0.04 | 0.03 | 0.02      | 0.01   |

409 **Table 8 Dynamic and static factor Importance Analysis**

| Factors | Slope | DTR  | DR   | DTF | MED  | DTS  | Elevation | PC   |
|---------|-------|------|------|-----|------|------|-----------|------|
| Gini    | 0.3   | 0.25 | 0.12 | 0.1 | 0.09 | 0.07 | 0.04      | 0.02 |

410 **5. Discussion**

411 **5.1 Models' comparison**

412 Different algorithms exhibit distinct focuses and design priorities, and their performance typically varies  
 413 depending on the specific research context, characteristics of the study area, and quality of input samples (Hussin  
 414 et al.,2016; Lai et al.,2019; Yilmaz et al.,2010). With the advancement of related technologies and the maturation of  
 415 theoretical frameworks, a variety of advanced algorithms—such as convolutional neural networks (CNNs)—have  
 416 been developed and increasingly applied to landslide susceptibility mapping (LSM) (Wang et al.,2019; Zhao et  
 417 al.,2024). These algorithmic advancements aim to enhance the prediction accuracy and reliability of LSM results.  
 418 The three algorithms adopted in this study are all tree-based ensemble algorithms. Regarding accuracy, the  
 419 performance of the three algorithms was similar throughout the training and validation stages. Overall, the

420 integration of SAR technology contributed to a measurable improvement in the general prediction accuracy of the  
421 models. Tree-based ensemble algorithms are capable of efficiently learning discriminative features from SAR-  
422 derived ground deformation interpretation data, illustrating the utility of incorporating this remote sensing  
423 technology to enhance the generalization capability of landslide susceptibility assessment models.

424 For LSM, the six models yield generally consistent predictions of the overall susceptibility spatial trends.  
425 However, traditional machine learning methods tend to delineate a larger proportion of the study area as  
426 moderately susceptible zones, which increases the uncertainty of the prediction results. Models integrated with  
427 SAR technology exhibit a reduced proportion of high/very high landslide susceptibility areas, accompanied by a  
428 corresponding increase in the proportion of low and very low susceptibility areas.

## 429 **5.2 Contribution of InSAR-Derived Deformation Data to Susceptibility Assessment**

430 In this study, ground deformation is treated as a dynamic influencing factor and incorporated into the  
431 comprehensive evaluation framework for landslide susceptibility. Compared with models that solely incorporate  
432 static factors, the algorithms integrated with SAR technology not only achieve improved prediction accuracy but  
433 also yield more rational spatial distribution patterns across different landslide susceptibility classes (Hua et al.,2021;  
434 Lamichhane et al.,2025). Through the analysis of the importance of the conditioning factors, deformation rate was  
435 essential (Devara et al.,2021).

436 Most prior studies rely on detailed landslide inventories, operating under the implicit assumption that the  
437 spatiotemporal patterns of future landslides will be consistent with historical and contemporary observations  
438 (Steger et al.,2017; Huang et al.,2024; Zhi et al.,2023). However, intensive human activities and sustained rainfall  
439 events frequently induce novel landslide patterns, thereby challenging the validity of this fundamental premise.  
440 The deployment of landslide monitoring equipment is not only associated with substantial economic costs but  
441 also faces challenges in providing effective early warning for sudden-onset geohazards. Notably, in southern  
442 China, slope cutting activities associated with rural residential construction and road development are widespread,  
443 and geological hazards are characterized by high frequency, extensive spatial distribution, and predominantly  
444 small scales, rendering comprehensive coverage by monitoring systems technically infeasible and economically  
445 impractical (Casagli et al.,2023).

446 Static landslide susceptibility assessment models tend to overestimate the stability of slopes that have been  
447 engineered for stabilization, while underestimating the instability of slopes disturbed by anthropogenic activities  
448 (Singh et al.,2010). Furthermore, the calibration of static landslide susceptibility assessment models must be  
449 updated in tandem with the refinement and expansion of landslide inventories. However, the refinement and  
450 expansion of landslide inventories are both financially costly and logistically infrequent. Consequently, the  
451 absence of timely updated landslide inventories readily leads to the underestimation of emerging landslide patterns  
452 triggered by urban expansion or shifts in meteorological event regimes.

453 Compared with traditional assessment methods that ignore dynamic deformation information, the integration  
454 of InSAR data provides two key improvements. 1. **Early Identification of disasters**: Traditional methods mainly  
455 rely on static factors (e.g., lithology, slope) to identify high-risk areas, but these factors cannot reflect the dynamic  
456 changes in slope stability. The InSAR-derived deformation data can capture subtle subsidence (e.g., -5 to -10  
457 mm/year) that is imperceptible to field surveys, enabling early identification of slopes in the "pre-landslide" stage;  
458 2. **Improvement of Assessment Accuracy**: **The validation results show that the overall accuracy of the**

459 susceptibility map is roughly a 5 percentage-point improvement compared to the traditional static assessment  
460 methods. This significant improvement confirms that InSAR data effectively fills the gap of dynamic information  
461 in traditional assessments (Chen et al.,2023).

462 However, the high- and low-deformation zones identified via SAR remote sensing do not precisely  
463 correspond to the high- and low-susceptibility areas predicted by the landslide susceptibility model. SBAS -  
464 InSAR also has limitations. For example, in areas with extremely high vegetation coverage (e.g., dense primeval  
465 forests), the coherence of SAR images is still low, leading to missing deformation data. Conversely, geological  
466 hazard occurrences exhibit inherent spatiotemporal randomness, while the current SAR remote sensing systems  
467 are constrained by finite spatiotemporal resolution. Therefore, the evaluation of landslide susceptibility should  
468 incorporate both static and dynamic factors.

469 In this study, only Sentinel 1 ascending-orbit data were used, and the derived deformation results represent  
470 the projection of real 3D surface displacement onto the radar line-of-sight (LOS), which has inherent limitations  
471 in discriminating different deformation types (Hu et al., 2014). Both ascending and descending Sentinel-1 data  
472 are freely available over the study area, providing favorable conditions for 3D displacement decomposition in  
473 future work. Combining ascending and descending observations can effectively separate horizontal and vertical  
474 displacement components, which helps distinguish landslide-related slope movements from anthropogenic  
475 subsidence (e.g., groundwater extraction and soil consolidation) (Fuhrmann & Garthwaite, 2019). The  
476 decomposed components with clearer physical meaning can also serve as more discriminative factors for machine  
477 learning models to reduce misclassification (Xiong & Zhu, 2026). Although 3D deformation decomposition is  
478 beyond the scope of this study, it will be an important direction for improving the proposed dynamic assessment  
479 framework in future research.

## 480 6. Conclusions

481 A high-quality landslide susceptibility map provides clear guidance for local disaster prevention and mitigation  
482 work. This study systematically explored the application of SBAS-InSAR in small-scale landslide susceptibility  
483 dynamic assessment, using tree-based ensemble algorithms and the Conghua district as the study area. The main  
484 conclusions are as follows:

485 1. The SBAS-InSAR technique enables the effective capture of spatiotemporal dynamic surface deformation  
486 information, which is of considerable significance for the identification and monitoring of small-scale landslide  
487 hazards in the southern China region.

488 2. Following the integration of deformation-derived dynamic factors, LSA based on the tree-based algorithm  
489 has achieved significant improvements in prediction accuracy and reliability—demonstrating the applicability of  
490 fusing SAR-derived deformation data with machine learning algorithms for dynamic landslide risk evaluation.

491 However, there are some limitations of the Study:

492 1. Diverse SAR technologies (e.g., SBAS-InSAR, PS-InSAR, TomoSAR) operating on identical SAR  
493 imagery exploit different scattering characteristics—permanent scatterers, distributed scatterers, and layover  
494 components—each with distinct applicability and limitations. Combined use of these methods can compensate  
495 for each other's shortcomings and yield more complete and accurate deformation results, which can be further  
496 incorporated into the LSA framework.

497 2. The integrated technology requires rigorous validation through multiple heterogeneous algorithms and

498 cross-validation across distinct geomorphological study areas with varying geological.  
499 **3. More timely and dynamic monitoring indicators should be included in the assessment.**

#### 500 **Data availability**

501 The data used to support the findings of this study are included within the article.

#### 502 **Author Contributions**

503 Z.L., writing—original draft, methodology, and software; W.P., W.L. and H.H., review and validation; J.H. and  
504 K.L., reviewing and editing. K.J. and G.L. are responsible for the review and validation. All authors have read  
505 and agreed to the published version of the manuscript.

#### 506 **Competing interests**

507 The authors declare that they have no conflict of interest.

#### 508 **Financial support**

509 This work was supported by the Key Science and Technology Program of the Ministry of Emergency Management  
510 of China under Grant no. 2024EMST050502. Last but not least, many thanks for the support of Academic  
511 Specialty Group for Urban Sensing in Chinese Society of Urban Planning.

#### 512 **References**

- 513 1. **Agrawal T. Hyperparameter optimization in machine learning: make your machine learning and deep learning models**  
514 **more efficient[J]. New York, NY, 2021: 109-129.**
- 515 2. Ado M, Amitab K, Maji A K, et al. Landslide susceptibility mapping using machine learning: A literature survey[J].  
516 Remote Sensing, 2022, 14(13): 3029.
- 517 3. Breiman L. Random forests[J]. Machine learning, 2001, 45(1): 5-32.
- 518 4. Berardino, P., Fornaro, G., Lanari, R., & Sansosti, E. (2002). A new algorithm for surface deformation monitoring  
519 based on small baseline differential SAR interferograms. IEEE Transactions on Geoscience and Remote Sensing,  
520 40(11), 2375 - 2383.
- 521 5. **Biggs J, Wright T, Lu Z, Parsons B. Multi-interferogram method for measuring interseismic deformation: Denali**  
522 **Fault, Alaska[J]. Geophysical Journal International, 2007, 170(3): 1165-1179.**
- 523 6. Chen T, He T, Benesty M, et al. Xgboost: extreme gradient boosting[J]. R package version 0.4-2, 2015, 1(4): 1-4.
- 524 7. Casagli N, Intrieri E, Tofani V, et al. Landslide detection, monitoring and prediction with remote-sensing  
525 techniques[J]. Nature Reviews Earth & Environment, 2023, 4(1): 51-64.
- 526 8. Chen L, Ma P, Yu C, et al. Landslide susceptibility assessment in multiple urban slope settings with a landslide  
527 inventory augmented by InSAR techniques[J]. Engineering Geology, 2023, 327: 107342.
- 528 9. Cui Y, Qian Z, Xu W, et al. A Small-Scale Landslide in 2023, Leshan, China: Basic Characteristics, Kinematic  
529 Process and Cause Analysis[J]. Remote Sensing, 2024, 16(17): 3324.
- 530 10. Castelli M, Filipello A, Fasciano C, et al. Geohazard Plugin: A QGIS Plugin for the Preliminary Analysis of  
531 Landslides at Medium–Small Scale[J]. Land, 2025, 14(2): 290.
- 532 11. **Chen Y ,Tang B ,Qiu J , et al. Evaluating Geological Disaster Susceptibility Using Information Value and Neural**  
533 **Network Models: A Case Study of Xi Ao Town, Guangdong Province[J]. Journal of Geoscience and Environment**  
534 **Protection,2025,13(09):289-314.DOI:10.4236/GEP.2025.139014.**
- 535 12. Devara M, Tiwari A, Dwivedi R. Landslide susceptibility mapping using MT-InSAR and AHP enabled GIS-based  
536 multi-criteria decision analysis[J]. Geomatics, Natural Hazards and Risk, 2021, 12(1): 675-693.

- 537 13. Dou H, He J, Huang S, et al. Influences of non-landslide sample selection strategies on landslide susceptibility  
538 mapping by machine learning[J]. *Geomatics, Natural Hazards and Risk*, 2023, 14(1): 2285719.
- 539 14. **Deng L, Yuan H, Zhang M, et al. Research progress on landslide deformation monitoring and early  
540 warning technology[J]. *Journal of Tsinghua University (Science and Technology)*, 2023, 63(6): 849-864.**
- 541 15. Ebrahim K M P, Gomaa S M M H, Zayed T, et al. Recent phenomenal and investigational subsurface landslide  
542 monitoring techniques: a mixed review[J]. *Remote Sensing*, 2024, 16(2): 385.
- 543 16. Ferretti A, Fumagalli A, Novali F, Prati C, Rocca F, Rucci A. A new algorithm for processing interferometric data-  
544 stacks: Squee SAR[J]. *IEEE Transactions on Geoscience and Remote Sensing*, 2011, 49(9): 3460-3470.
- 545 17. Guarnieri A M, Tebaldini S. On the exploitation of target statistics for SAR interferometry applications[J]. *IEEE  
546 Transactions on Geoscience and Remote Sensing*, 2008, 46(11): 3436-3443.
- 547 18. Guo J, Xi W, Yang Z, et al. Landslide hazard susceptibility evaluation based on SBAS-InSAR technology and SSA-  
548 BP neural network algorithm: A case study of Baihetan Reservoir Area[J]. *Journal of Mountain Science*, 2024, 21(3):  
549 952-972.
- 550 19. Hussin H Y, Zumpano V, Reichenbach P, et al. Different landslide sampling strategies in a grid-based bi-variate  
551 statistical susceptibility model[J]. *Geomorphology*, 2016, 253: 508-523.
- 552 20. Hua Y, Wang X, Li Y, et al. Dynamic development of landslide susceptibility based on slope unit and deep neural  
553 networks[J]. *Landslides*, 2021, 18(1): 281-302.
- 554 21. Hodasová K, Bednarik M. Effect of using various weighting methods in a process of landslide susceptibility  
555 assessment[J]. *Natural Hazards*, 2021, 105(1): 481-499.
- 556 22. Huang F, Mao D, Jiang S H, et al. Uncertainties in landslide susceptibility prediction modeling: A review on the  
557 incompleteness of landslide inventory and its influence rules[J]. *Geoscience Frontiers*, 2024, 15(6): 101886.
- 558 23. Huang S, Chen L. Landslide susceptibility mapping using an integration of different statistical models for the 2015  
559 Nepal earthquake in Tibet[J]. *Geomatics, Natural Hazards and Risk*, 2024, 15(1): 2396908.
- 560 24. Huang F, Xiong H, Jiang S H, et al. Modelling landslide susceptibility prediction: A review and construction of semi-  
561 supervised imbalanced theory[J]. *Earth-Science Reviews*, 2024, 250: 104700.
- 562 25. Hong H, Wang D, Zhu A X, et al. Landslide susceptibility mapping based on the reliability of landslide and non-  
563 landslide sample[J]. *Expert Systems with Applications*, 2024, 243: 122933.
- 564 26. Hussain S, Pan B, Hussain W, et al. Integrated PSInSAR and SBAS-InSAR analysis for landslide detection and  
565 monitoring[J]. *Physics and Chemistry of the Earth, Parts A/B/C*, 2025: 103956.
- 566 27. **Jiang M, Ding X L, Li Z W. Fast statistically homogeneous pixel selection for covariance matrix estimation for  
567 multitemporal InSAR[J]. *IEEE Transactions on Geoscience and Remote Sensing*, 2015, 53(3): 1213-1224.**
- 568 28. Ke G, Meng Q, Finley T, et al. Lightgbm: A highly efficient gradient boosting decision tree[J]. *Advances in neural  
569 information processing systems*, 2017, 30.
- 570 29. Kovács I P, Czigány S, Dobre B, et al. A field survey-based method to characterise landslide development: a case  
571 study at the high bluff of the Danube, south-central Hungary[J]. *Landslides*, 2019, 16(8): 1567-1581.
- 572 30. **Karl F, Pielok T, Moosbauer J, et al. Multi-objective hyperparameter optimization in machine learning—An  
573 overview[J]. *ACM Transactions on Evolutionary Learning and Optimization*, 2023, 3(4): 1-50.**
- 574 31. Lai J S, Chiang S H, Tsai F. Exploring influence of sampling strategies on event-based landslide susceptibility  
575 modeling[J]. *ISPRS International Journal of Geo-Information*, 2019, 8(9): 397.
- 576 32. Liang Z, Wang C, Duan Z, et al. A hybrid model consisting of supervised and unsupervised learning for landslide  
577 susceptibility mapping[J]. *Remote Sensing*, 2021, 13(8): 1464.
- 578 33. Liang Z, Wang C, Khan K U J. Application and comparison of different ensemble learning machines combining with a  
579 novel sampling strategy for shallow landslide susceptibility mapping[J]. *Stochastic Environmental Research and Risk  
580 Assessment*, 2021, 35(6): 1243-1256.
- 581 34. Liang Z, Peng W, Liu W, et al. Exploration and comparison of the effect of conventional and advanced modeling  
582 algorithms on landslide susceptibility prediction: A case study from Yadong Country, Tibet[J]. *Applied Sciences*,  
583 2023, 13(12): 7276.
- 584 35. Lie X U, Nengpan J U, Mingdong D, et al. Comparative analysis of landslide susceptibility assessment accuracy in  
585 different evaluation units[J]. *Journal of Engineering Geology*, 2024, 32(5): 1640-1653.
- 586 36. Liu S, Du J, Yin K, et al. Regional early warning model for rainfall induced landslide based on slope unit in  
587 Chongqing, China[J]. *Engineering Geology*, 2024, 333: 107464.
- 588 37. Li M, Wang H, Chen J, et al. Assessing landslide susceptibility based on the random forest model and multi-source  
589 heterogeneous data[J]. *Ecological Indicators*, 2024, 158: 111600.
- 590 38. Lamichhane S, Kansakar A R, Devkota N, et al. Integrating dynamic factors for predicting future landslide  
591 susceptibility[J]. *Environmental Earth Sciences*, 2025, 84(3): 89.
- 592 39. **Liu S, Wang T, Xing G, et al. Critical rainfall thresholds for landslides based on extreme rainfall-induced  
593 clustered landslides and characteristic rainfall parameter analysis: a case study in Western Qinling  
594 Mountains, China[J]. *Landslides*, 2026: 1-16.**

- 595 40. **Mirzaee S, Amelung F, Fattahi H. Non-linear phase linking using joined distributed and persistent**  
596 **scatterers[J]. Computers & Geosciences, 2023, 171: 105291.**
- 597 41. Nwazelibe V E, Egbueri J C. Geospatial assessment of landslide-prone areas in the southern part of Anambra State,  
598 Nigeria using classical statistical models[J]. Environmental Earth Sciences, 2024, 83(7): 220.
- 599 42. Nie W, Tian C, Song D, et al. Disaster process and multisource information monitoring and warning method for  
600 rainfall-triggered landslide: a case study in the southeastern coastal area of China[J]. Natural Hazards, 2025, 121(3):  
601 2535-2564.
- 602 43. Steger S, Brenning A, Bell R, et al. The influence of systematically incomplete shallow landslide inventories on  
603 statistical susceptibility models and suggestions for improvements[J]. Landslides, 2017, 14(5): 1767-1781.
- 604 44. Sun L, Zhao Y, Sun Y, et al. Study on the reactivation mechanism and weak substrate effect of bottom-saturated  
605 reservoir old landslides–based on a small-scale model[J]. Bulletin of Engineering Geology and the Environment, 2025,  
606 84(9): 420.
- 607 45. Singh T N, Verma A K, Sarkar K. Static and dynamic analysis of a landslide[J]. Geomatics, Natural Hazards and Risk,  
608 2010, 1(4): 323-338.
- 609 46. Wang Y, Fang Z, Hong H. Comparison of convolutional neural networks for landslide susceptibility mapping in  
610 Yanshan County, China[J]. Science of the total environment, 2019, 666: 975-993.
- 611 47. Wang D, Hao M, Chen S, et al. Assessment of landslide susceptibility and risk factors in China[J]. Natural hazards,  
612 2021, 108(3): 3045-3059.
- 613 48. Wang L, Zhang K, Chen Y, et al. Progressive deformation mechanism of colluvial landslides induced by rainfall:  
614 insights from long-term field monitoring and numerical study[J]. Landslides, 2024, 21(12): 3069-3086.
- 615 49. Wang C, Yang Y, Zhang X, et al. Ultra-High Sensitivity Real-Time Monitoring of Landslide Surface Deformation via  
616 Triboelectric Nanogenerator[J]. Advanced Materials, 2024, 36(50): 2410471.
- 617 50. Yilmaz I. The effect of the sampling strategies on the landslide susceptibility mapping by conditional probability and  
618 artificial neural networks[J]. Environmental Earth Sciences, 2010, 60(3): 505-519.
- 619 51. Ye C, Wei R, Ge Y, et al. GIS-based spatial prediction of landslide using road factors and random forest for Sichuan-  
620 Tibet Highway[J]. Journal of Mountain Science, 2022, 19(2): 461-476.
- 621 52. Zhang K, Song H, Sun S, et al. Distribution and genesis of submarine landslides in the northeastern South China  
622 Sea[J]. Geological Journal, 2021, 56(3): 1187-1201.
- 623 53. Zhang J, Ma X, Zhang J, et al. Insights into geospatial heterogeneity of landslide susceptibility based on the SHAP-  
624 XGBoost model[J]. Journal of environmental management, 2023, 332: 117357.
- 625 54. Zhiyong F, Changdong L, Wenmin Y. Landslide susceptibility assessment through TrAdaBoost transfer learning  
626 models using two landslide inventories[J]. Catena, 2023, 222: 106799.
- 627 55. Zhao Z, Chen T, Dou J, et al. Landslide susceptibility mapping considering landslide local-global features based on  
628 CNN and transformer[J]. IEEE Journal of Selected Topics in Applied Earth Observations and Remote Sensing, 2024,  
629 17: 7475-7489.
- 630 56. Zhou C, Gan L, Cao Y, et al. Landslide susceptibility assessment of the Wanzhou district: Merging landslide  
631 susceptibility modelling (LSM) with InSAR-derived ground deformation map[J]. International Journal of Applied  
632 Earth Observation and Geoinformation, 2025, 136: 104365.
- 633 57. Zhang J, Zuo X, Li Y, et al. Detection and assessment of potential landslides in the Xiaojiang River Basin using  
634 SBAS-InSAR[J]. Scientific Reports, 2025, 15(1): 16082.

635
